# Supplementary material for: Surgical Stress Abrogates Pre-Existing Protective T Cell Mediated Anti-Tumor Immunity Leading to Postoperative Cancer Recurrence
Source: PubMed Central journal article supplement (PMC4873120; doi:10.1371/journal.pone.0155947), 2016-05-19
Supplement: pone.0155947.s005.pdf [file pone.0155947.s005.pdf]

# Supplemental Figure 5
