# Supplementary material for: Surgical Stress Abrogates Pre-Existing Protective T Cell Mediated Anti-Tumor Immunity Leading to Postoperative Cancer Recurrence
Source: PubMed Central journal article supplement (PMC4873120; doi:10.1371/journal.pone.0155947), 2016-05-19
Supplement: pone.0155947.s006.pdf [file pone.0155947.s006.pdf]

# Supplemental Table 1

| Animal ID | Procedure | Baseline BW | Attitude | Piloerection | Facial Grimace Score | Hydration |
|-----------|-----------|-------------|----------|--------------|----------------------|-----------|
| 1         | abd nx    | 19.7        | -        | -            | -                    | -         |
| 2         | abd nx    | 22.5        | -        | -            | -                    | -         |
| 3         | abd nx    | 18.5        | -        | -            | -                    | -         |
| 4         | abd nx    | 19.2        | -        | -            | -                    | -         |
| 5         | abd nx    | 20.2        | -        | -            | -                    | -         |

| Animal ID | Procedure | POD1 BW | Attitude | Piloerection | Facial Grimace Score | Hydration |
|-----------|-----------|---------|----------|--------------|----------------------|-----------|
| 1         | abd nx    | 19.5    | M1       | M2           | M1                   | M1        |
| 2         | abd nx    | 22      | M2       | M2           | M1                   | M2        |
| 3         | abd nx    | 18.1    | M1       | M2           | M1                   | M1        |
| 4         | abd nx    | 19      | M1       | M1           | M1                   | M1        |
| 5         | abd nx    | 20      | M1       | M1           | M1                   | M1        |

| Animal ID | Procedure | POD2 BW | Attitude | Piloerection | Facial Grimace Score | Hydration |
|-----------|-----------|---------|----------|--------------|----------------------|-----------|
| 1         | abd nx    | 19.2    | M2       | M2           | M2                   | M2        |
| 2         | abd nx    | 21.9    | M2       | M2           | M2                   | M2        |
| 3         | abd nx    | 17.9    | M2       | M2           | M2                   | M2        |
| 4         | abd nx    | 18.6    | M1       | M2           | M2                   | M2        |
| 5         | abd nx    | 19.6    | M1       | M2           | M2                   | M2        |

| Animal ID | Procedure | POD3 BW | Attitude | Piloerection | Facial Grimace Score | Hydration |
|-----------|-----------|---------|----------|--------------|----------------------|-----------|
| 1         | abd nx    | 18.6    | M2       | M2           | M2                   | M3        |
| 2         | abd nx    | 21.5    | M2       | M2           | M2                   | M2        |
| 3         | abd nx    | 17.6    | M2       | M3           | M2                   | M3        |
| 4         | abd nx    | 18      | M2       | M3           | M2                   | M2        |
| 5         | abd nx    | 19.1    | M2       | M2           | M2                   | M2        |
